# Supplementary material for: Imaging the electrical activity of organelles in living cells
Source: PubMed Central journal article supplement (PMC7988155; doi:10.1038/s42003-021-01916-6), 2021-03-23
Supplement: 42003_2021_1916_MOESM3_ESM.pdf [file 42003_2021_1916_MOESM3_ESM.pdf]

## **Description of Additional Supplementary Files**

**File name:** Supplementary Movie 1

**Description:** One cell exposed to digitonin.  $\Delta F/F$  signal in pseudo color for a cell expressing hVoSorg and treated with digitonin. Digitonin was added in frame 10

**File name:** Supplementary Movie 2

**Description:** One cell exposed to rapamycin.  $\Delta F/F$  signal in pseudo color for a cell expressing hVoSorg and exposed to rapamycin. Rapamycin was added in frame 10.

**File name:** Supplementary Data 1

**Description:** Supplementary Data 1. Annex1. Multi compartment model describing DPA distribution within membrane compartments implemented as a series of differential equations written in Python language. The original file and source data is available in the Github repository (<https://github.com/brauchilab/DPA-quenching-model>).

**File name:** Supplementary Data 2

**Description:** Source data used to fit the mathematical model.
